# Supplementary material for: In Vitro Evaluation of Dental Resin Monomers, Triethylene Glycol Dimethacrylate (TEGDMA), and 2-Hydroxyethyl Methacrylate (HEMA) in Primary Human Melanocytes: A Pilot Study
Source: MDPI journal article supplement (doi:10.3390/oral3030029), 2023-08-03
Supplement: s1 [file s1]

# Supplementary Materials: In Vitro Evaluation of Dental Resin Monomers, Triethylene Glycol Dimethacrylate (TEGDMA), and 2-Hydroxyethyl Methacrylate (HEMA) in Primary Human Melanocytes: A Pilot Study

Shilpi Goenka<sup>1,2</sup>

<sup>1</sup> Department of Biochemistry and Cell Biology, Stony Brook University, Stony Brook, NY 11794-5215, USA; shilp.goenka@gmail.com

<sup>2</sup> Department of Biomedical Engineering, Stony Brook University, Stony Brook, NY 11794-5281, USA

## Supplementary Methods

### *Cytotoxicity Assay in Melanocytes from Another Donor*

$1 \times 10^4$  cells from a different donor (a neonatal, darkly pigmented donor, HEMn-DP; Cascade Biologics Cat# C2025C) were cultured in a 96-well plate for 48 h. Both monomers (TEGDMA and HEMA) were added to cells over a concentration range (0.25–3 mM), and cultures were maintained for 72 h. After this, 50  $\mu$ L of culture medium was collected and subjected to an LDH cytotoxicity assay similar to the method described in the methods section of the main text. MTS dye-containing medium was added for cells remaining in wells, and the plate was incubated for 2 h at 37 °C. The absorbance of aliquots (100  $\mu$ L) was read at 490 nm using a microplate reader.

## Supplementary Figures

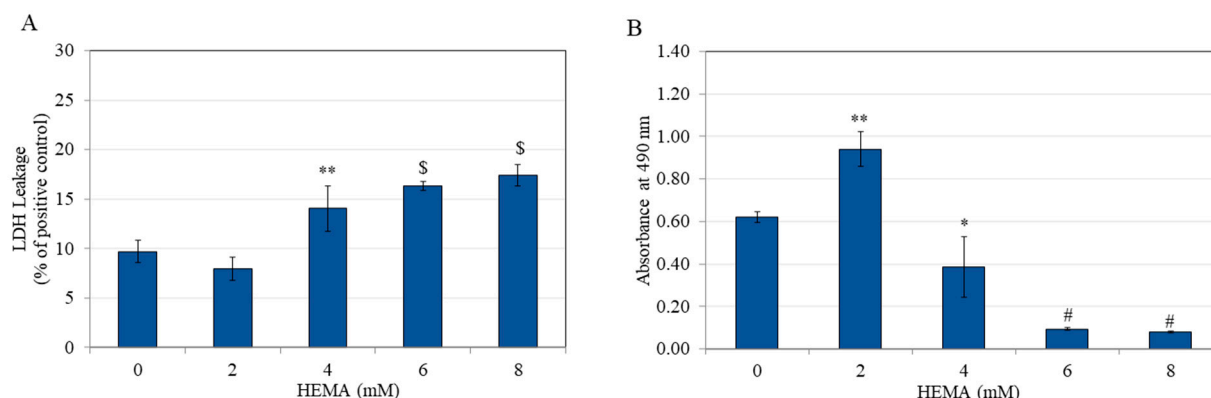

**Figure S1.** (A) Cytotoxicity (LDH leakage) and (B) Viability (absorbance at 490 nm) of melanocytes treated with HEMA monomer over a higher concentration range of 2–8 mM for 72 h; \*  $p < 0.05$ , \*\*  $p < 0.01$ , \$  $p < 0.001$ , and #  $p < 0.0001$  vs. control (0 mM group); one-way ANOVA with Dunnett's post-hoc test; Data are mean  $\pm$  SD of one representative experiment in triplicates of two separate experiments.

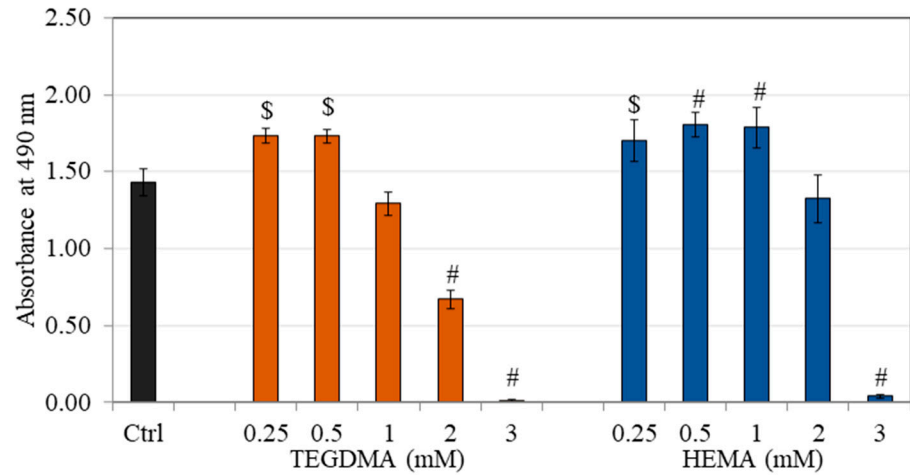

**Figure S2.** Viability of melanocytes from a different donor (HEMn-DP cells) treated with monomers TEGDMA and HEMA over a concentration range of 0.25–3 mM for 72 h; \$  $p < 0.001$  and #  $p < 0.0001$  vs. control group (Ctrl); one-way ANOVA with Dunnett's post-hoc test; Data are mean  $\pm$  SD of quadruplicate determinations ( $n = 4$  per group).

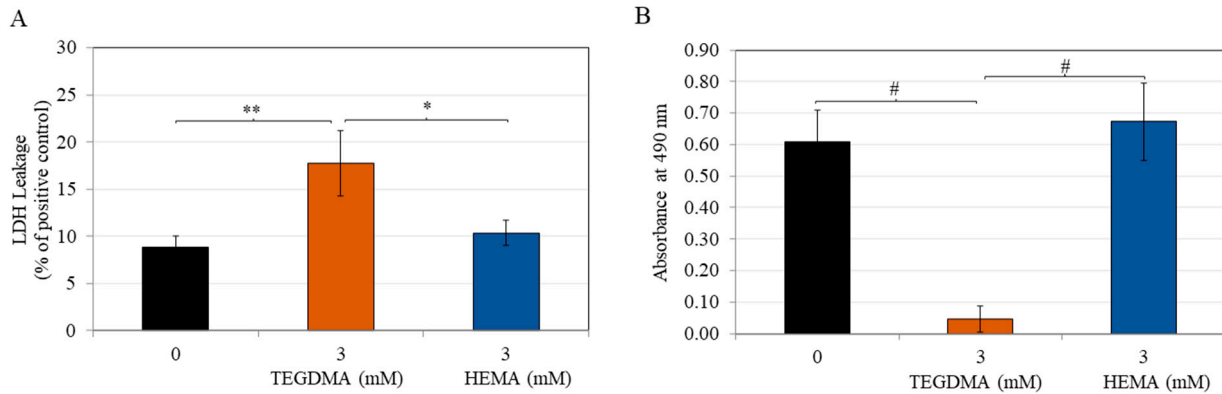

**Figure S3. (A)** Cytotoxicity (LDH leakage) and **(B)** Viability of melanocytes treated with TEGDMA and HEMA monomers each at a concentration of 3 mM for 72 h; \*  $p < 0.05$ , \*\*  $p < 0.01$ , and #  $p < 0.0001$ ; one-way ANOVA with Tukey's post-hoc test; Data are mean  $\pm$  SD of three independent experiments for A) and four independent experiments for B).
